# Supplementary material
Source: PubMed Central journal article supplement (PMC3851942)
Supplement: NIHMS522567-supplement-01.pdf [file NIHMS522567-supplement-01.pdf]

# Supplemental Figure 1

ATPase  
pH4.3

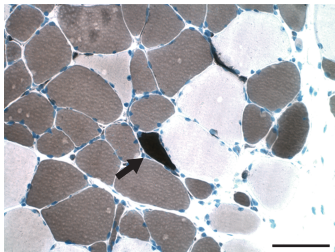

ATPase  
pH9.4

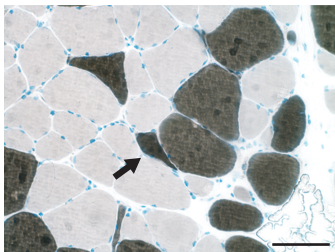

H&E

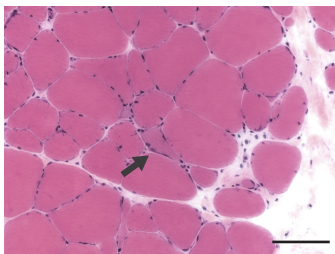

# Supplemental Figure 2

## SETMAR

Patient PAPFQYTPDHVVGPG**T**DIDPTQITFFGCICV  
Homo sapiens PAPFQYTPDHVVGPG**A**DIDPTQITFFGCICV  
Mus musculus PKPFQYTPDHVAGPG**A**DIDPTQITFFGCACI  
Canis lupus familiaris PEPFQYTPDHVAGPG**T**DVDPTQITFFGCICL  
Anolis carolinensis APAFQYSPDHVAGKE**G**KPDPSEISFFPGCSCH  
Xenopus tropicalis LPAFQYTPELIAGPG**A**EQDPSEVTIQGCDRC  
Danio rerio LSYFQYVPENVQGPG**C**DLDPNAVTLPGCSCR

## FAM105B

Patient YNTEEFITVYPTDPP**E**DWPVVTLIAEDDRHY  
Homo sapiens YNTEEFITVYPTDPP**K**DWPVVTLIAEDDRHY  
Mus musculus YNTEEFITVYPTDPP**K**DWPMVTLIAEDDRHY  
Canis lupus familiaris YSTEEFITVYPTDPP**M**DWPVVTLIAEDDRHY  
Anolis carolinensis YSTDEFIAFYPNPE**E**HWPVVTLITEDDRHY  
Xenopus tropicalis CGTDEFITYYPND-**K**TNWPTVTLITEDDRHY  
Danio rerio TDTEEFVTHYPDDHK**H**EWPCVCIVTEDDRHY

# Supplemental Figure 3

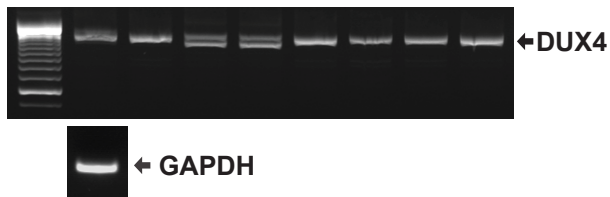

### *Supplemental figure 1*

H&E and ATPase staining of matching sections of biopsied muscle from affected subject II-5. Some small angular fibers (arrow) are observed in the area with less endomysial fibrosis. Some of the small angular fibers are type 2C. Scale bar = 100  $\mu$ m.

### *Supplemental figure 2*

Two of three variants that co-segregate with the phenotype are in the *SETMAR* and *FAM105B* genes. Amino acids p.Ala63 in *SETMAR* and p.Lys325 in *FAM105B* are not well conserved, suggesting that these are rare but benign polymorphisms.

### *Supplemental figure 3*

*DUX4* expression of biopsied muscle from subject II-5. Full length *DUX4* expression was detected by RT-PCR in all 8 replicates from a single biopsy sample. Eight replicates were run because the *DUX4* signal may vary between PCR reactions due to its very low expression levels. PCR for *GAPDH* is used as a control for mRNA integrity and cDNA synthesis. The PCR in the lanes 3 and 4 suggests the presence of a rare short isoform as well as the long isoform [1].

Supplemental Table 1

|         |                                  | chromosome | Affected |      |        | Unaffected |      |      |       |
|---------|----------------------------------|------------|----------|------|--------|------------|------|------|-------|
|         |                                  |            | III-11   | II-5 | III-10 | II-6       | II-2 | II-1 | III-8 |
| PRDM2   | NM_001007257:c.A2440G:p.T814A    | 1          |          | +    | +      | -          | -    | -    | +     |
| KBTBD10 | NM_006063:c.G1735T:p.A579S       | 2          |          | +    | +      | -          | +    | -    | -     |
| SCRN3   | NM_024583:c.G352A:p.E118K        | 2          |          | +    | +      | -          | -    | +    | -     |
| FRZB    | NM_001463:c.T272G:p.M91R         | 2          |          | +    | +      | -          | -    | +    | -     |
| SETMAR  | NM_001243723:c.G187A:p.A63T      | 3          | +        | +    | +      | -          | -    | -    | -     |
| STAB1   | NM_015136:c.G2869A:p.G957S       | 3          |          | +    | +      | -          | -    | +    | +     |
| DZIP3   | NM_014648:c.C3514T:p.Q1172X      | 3          |          | +    | +      | -          | -    | +    | -     |
| DIRC2   | NM_032839:c.T140G:p.V47G         | 3          | -        | +    | +      | -          | -    | -    | -     |
| CPEB2   | NM_001177383:c.C779A:p.P260Q     | 3          |          | +    | +      | -          | +    | -    | -     |
| CHST2   | NM_004267:c.C364T:p.L122F        | 3          |          | +    | +      | -          | -    | +    | -     |
| IDUA    | NM_000203:c.C1345A:p.H449N       | 4          |          | +    | +      | -          | -    | -    | +     |
| FAM105B | NM_138348:c.A973G:p.K325E        | 5          | +        | +    | +      | -          | -    | -    | -     |
| FOXD1   | NM_004472:c.G332A:p.G111D        | 5          |          | +    | +      | -          | +    | -    | -     |
| SMCHD1  | NM_015295:c.823_825del:p.K275del | 18         | +        | +    | +      | -          | -    | -    | -     |
| LRRC4B  | NM_001080457:c.G1220T:p.G407V    | 19         |          | +    | +      | -          | -    | +    | -     |
| BFSP1   | NM_001161705:c.G1036C:p.V346L    | 20         |          | +    | +      | -          | +    | -    | -     |
| NFS1    | NM_021100:c.A299C:p.E100A        | 20         |          | +    | +      | -          | +    | -    | -     |
| RLIM    | NM_183353:c.T1411C:p.S471P       | X          | -        | +    | +      | -          | -    | -    | -     |

Eighteen variants within the linkage peaks were found to co-segregate with the phenotype of II-5, II-6 and III-10. Among these, three variants, in *SETMAR*, *FAM105B* and *SMCHD1*, co-segregated with the phenotype in all available subjects.

Supplemental Table 2

**SETMAR p.Ala63Thr**

|            |          |           |
|------------|----------|-----------|
| SIFT       | 0.06     | Tolerated |
| PolyPhen-2 | 0.523217 | Benign    |

**FAM105B p.Lys325Glu**

|            |      |           |
|------------|------|-----------|
| SIFT       | 0.71 | Tolerated |
| PolyPhen-2 | 0    | Benign    |

The variants in *SETMAR* and *FAM105B* result in p.Ala63Thr and p.Lys325Glu alterations, respectively. *In silico* analysis using SIFT (<http://sift.jcvi.org/>) and PolyPhen-2 (<http://genetics.bwh.harvard.edu/pph2/>) predicts that these alterations are tolerated, i.e., benign.

*Supplemental reference*

- [1] Snider L, Geng LN, Lemmers RJ, et al. Facioscapulohumeral dystrophy: incomplete suppression of a retrotransposed gene. *PLoS Genet* 2010;6:e1001181.
